# Supplementary material for: Investigation of the reactions of U, U+and U2+with ammonia: mechanisms and topological analysis
Source: Royal Society of Chemistry journal article supplement (doi:10.1039/c4ra03525a), 2014-06-09
Supplement: c4ra03525a1.pdf [file c4ra03525a1.pdf]

## Supporting Information

### Investigation of the Reactions of U, U<sup>+</sup> and U<sup>2+</sup> with Ammonia: Mechanisms and Topological Analysis

Peng Li,<sup>a</sup> Wenxia Niu,<sup>b</sup> and Tao Gao <sup>a\*</sup>

<sup>a</sup> Institute of Atomic and Molecular Physics, Sichuan University, Chengdu, 610065, China

<sup>b</sup> College of Physical Science and Technology, Sichuan University, Chengdu 610065, China

#### Table of Contents:

1. The ELF localization domains corresponding to the lowest-energy minima and transition states of U<sup>+(2+)</sup> + NH<sub>3</sub> reaction are shown in Fig. S1 and S2.

**Fig. S1.** ELF localization domains ( $\eta=0.70$ ) of the lowest energy minima and transition states corresponding to the U<sup>+</sup> + NH<sub>3</sub> reaction pathway.

**Fig. S2.** ELF localization domains ( $\eta=0.70$ ) of the lowest energy minima and transition states corresponding to the U<sup>2+</sup> + NH<sub>3</sub> reaction pathway.

2. IRC energy and Wiberg bond order along the reaction coordinate  $s$  calculated at the PW91/SDD levels corresponding to the U<sup>+(2+)</sup> + NH<sub>3</sub> are shown in Fig. S3 and S4.

**Fig. S3.** IRC energy and Wiberg bond order along the reaction coordinate  $s$  calculated at the PW91/SDD levels corresponding to the U<sup>+</sup> + NH<sub>3</sub>. Black solid curves are the energy and coloured curves are Wiberg bond order.

**Fig. S4.** IRC energy and Wiberg bond order along the reaction coordinate  $s$  calculated at the PW91/SDD levels corresponding to the U<sup>2+</sup> + NH<sub>3</sub>. Black solid curves are the energy and coloured curves are Wiberg bond order.

3. *Ab Initio* molecular dynamics simulation of the product H<sub>2</sub>UNH.

**Fig. S5.** The RMSD at different temperatures for the product H<sub>2</sub>UNH.

1. Fig. S1 and Fig. S2

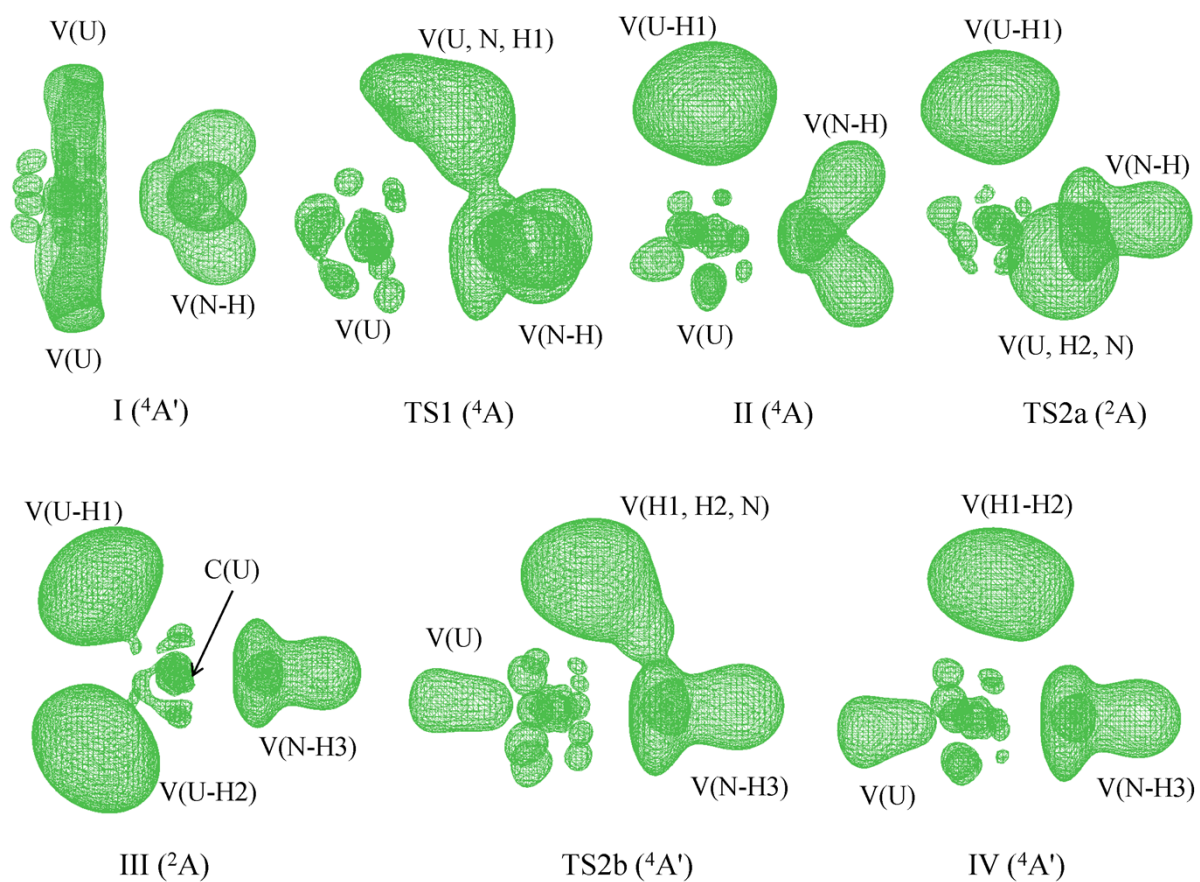

**Fig. S1** ELF localization domains ( $\eta=0.70$ ) of the lowest energy minima and transition states corresponding to the  $U^+ + NH_3$  reaction pathway.

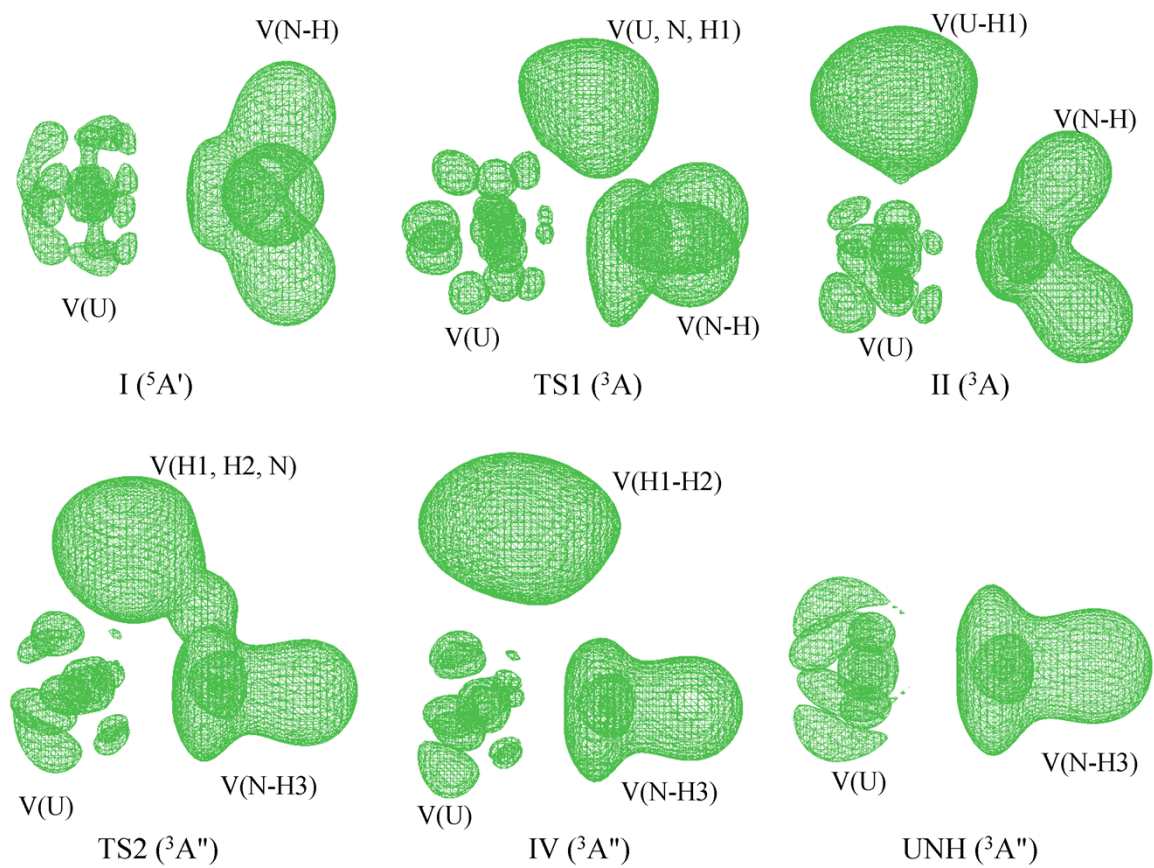

**Fig. S2** ELF localization domains ( $\eta=0.70$ ) of the lowest energy minima and transition states corresponding to the  $U^{2+} + NH_3$  reaction pathway.

## 2. Fig. S3 and Fig. S4

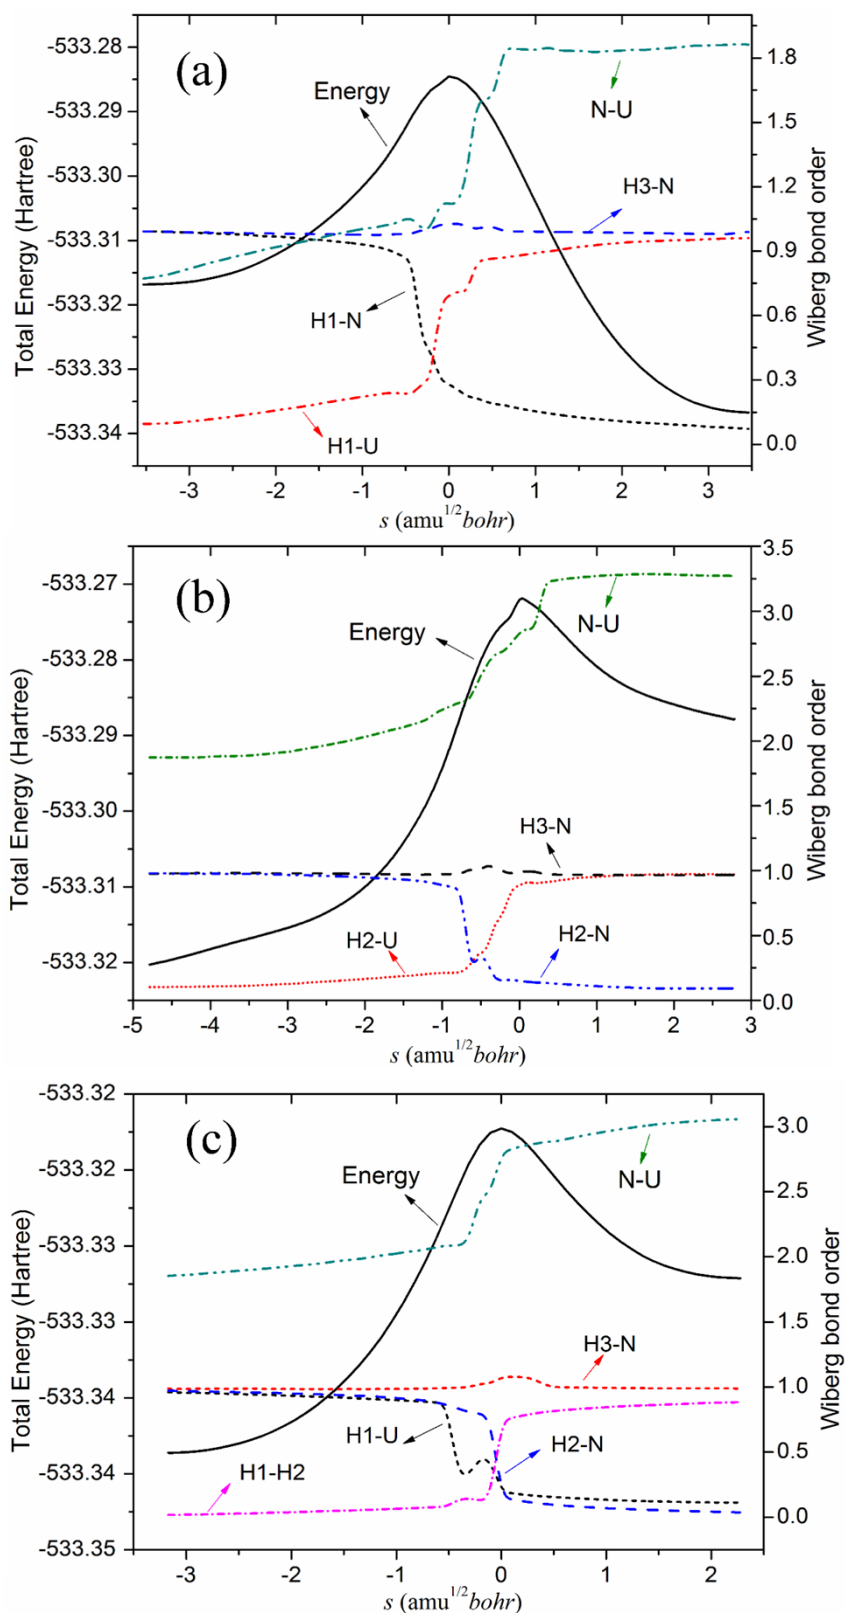

**Fig. S3** IRC energy and Wiberg bond order along the reaction coordinate  $s$  calculated at the PW91/SDD levels corresponding to the  $\text{U}^+ + \text{NH}_3$ . Black solid curves are the energy and coloured curves are wiberg bond order. (a)  $\text{U}^+ - \text{NH}_3 \rightarrow \text{TS1} \rightarrow \text{HUNH}_2^+$ ; (b)  $\text{HUNH}_2^+ \rightarrow \text{TS2a} \rightarrow \text{HNUH}_2^+$ ; (c)  $\text{HUNH}_2^+ \rightarrow \text{TS2b} \rightarrow \text{H}_2 - \text{UNH}^+$ .

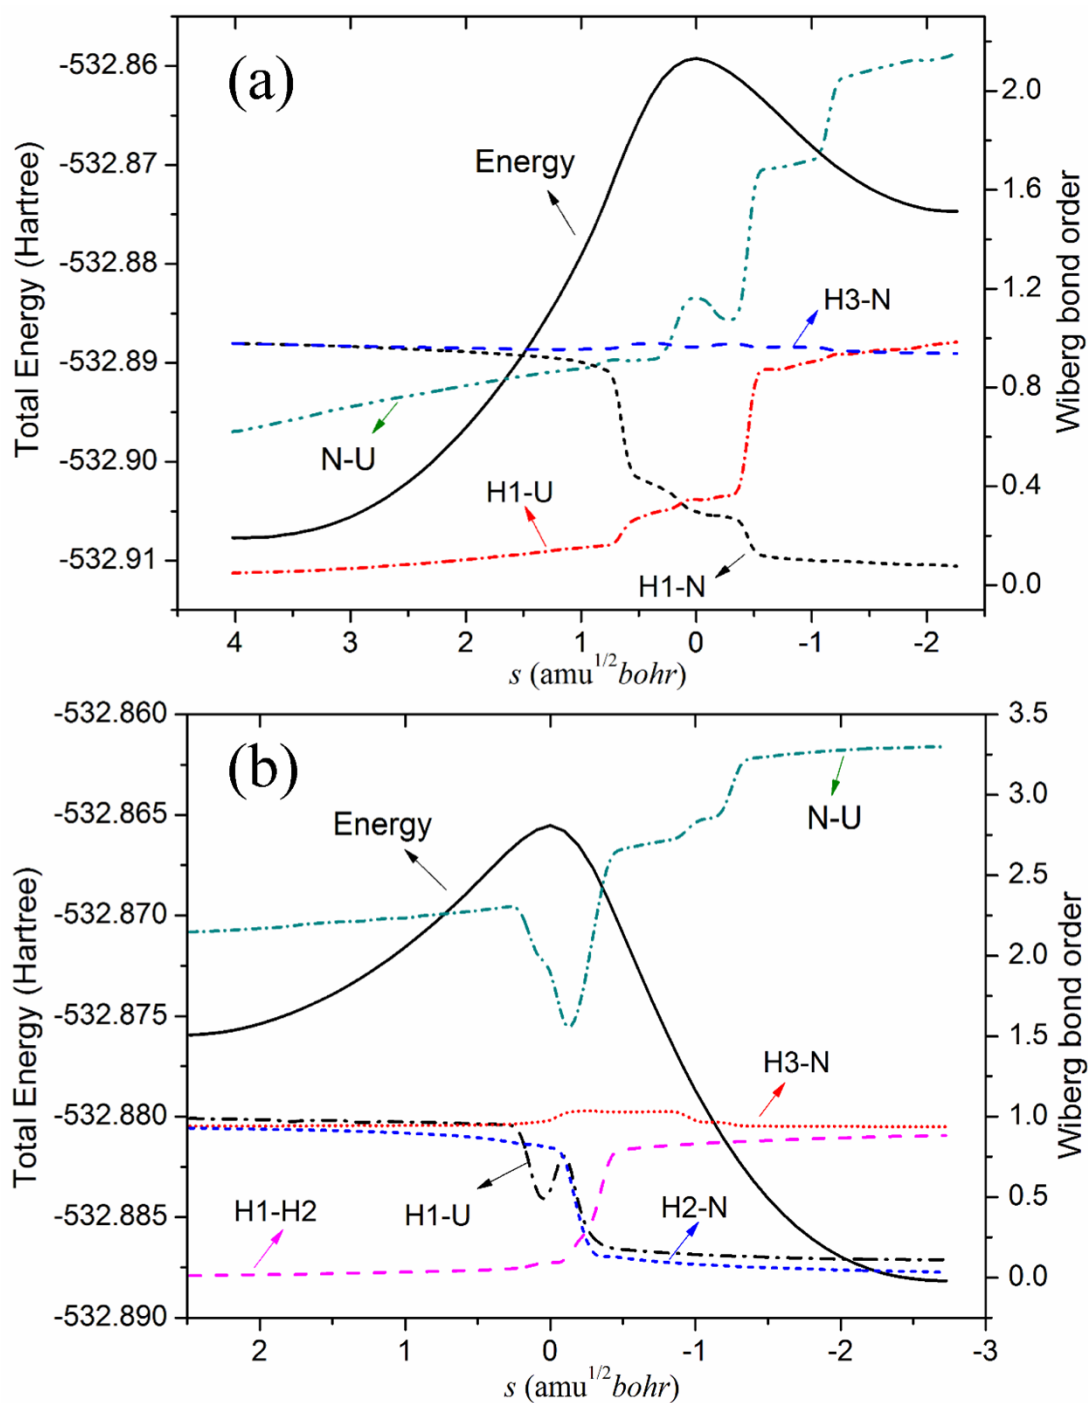

**Fig. S4** IRC energy and Wiberg bond order along the reaction coordinate  $s$  calculated at the PW91/SDD levels corresponding to the  $U^{2+} + NH_3$ . Black solid curves are the energy and coloured curves are wiberg bond order. (a)  $U^{2+}-NH_3 \rightarrow TS1 \rightarrow HUNH_2^{2+}$ ; (b)  $HUNH_2^{2+} \rightarrow TS2 \rightarrow H_2-UNH_2^+$ .

### 3. *Ab Initio* molecular dynamics simulation of the product H<sub>2</sub>UNH.

We performed *ab Initio* molecular dynamics simulation to confirm the thermal stability of the product H<sub>2</sub>UNH. Simulations are carried out for almost 5 ps using the BOMD method in Gaussian03. Our result indicates that the H<sub>2</sub>UNH is stabilized. Using the dynamics simulations results, we plotted the root mean square displacement (RMSD) through time at different temperature (300 and 500K). The results are shown in the following figures. Our MD runs indicate that the H<sub>2</sub>UNH structure keeps its identity at both room temperature (300 K) and high temperature (500 K).

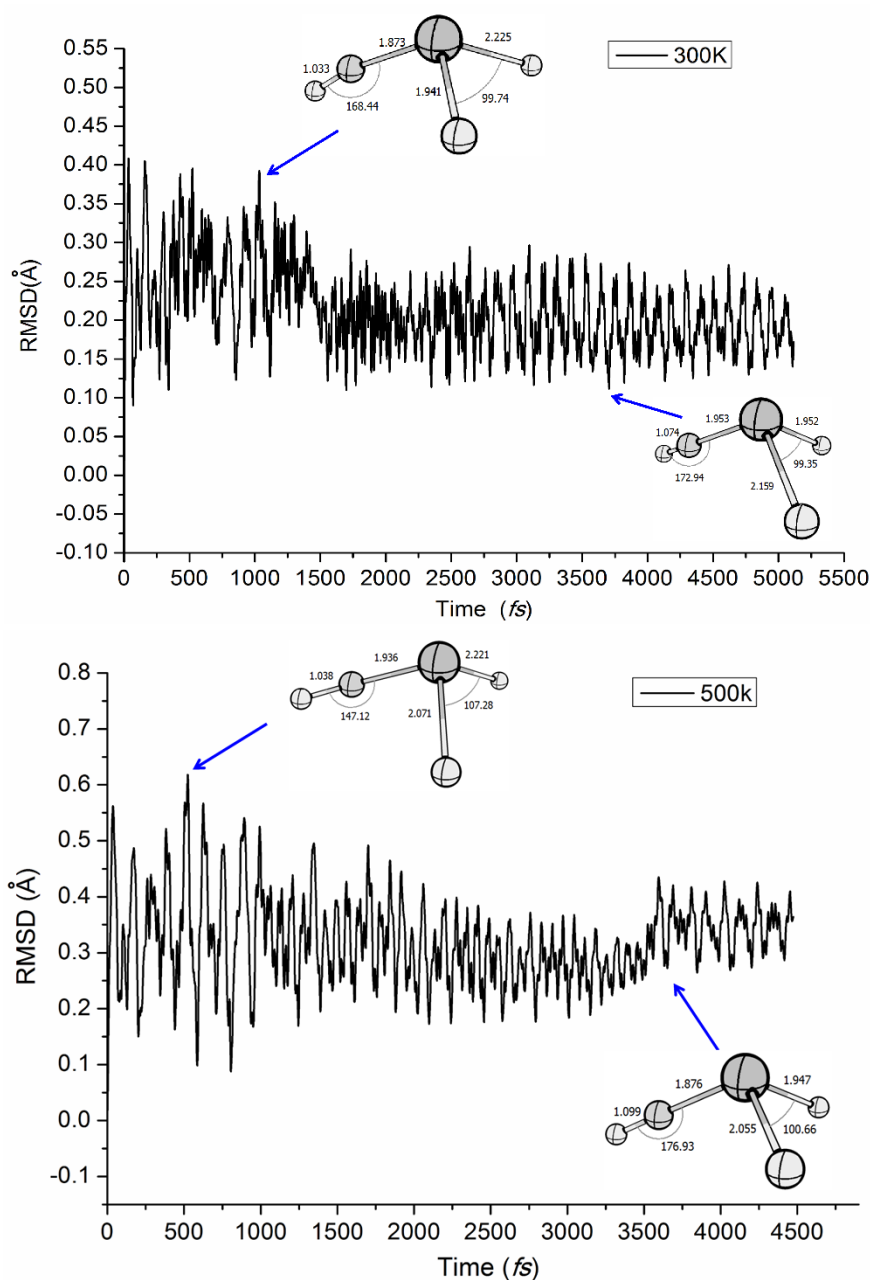

**Fig. S5.** The RMSD at different temperatures for the product H<sub>2</sub>UNH.
